# Supplementary material for: Effect of Fermentation Parameters on Natto and Its Thrombolytic Property
Source: MDPI journal article supplement (doi:10.3390/foods10112547), 2021-10-22
Supplement: s1 [file s1]

Table S1 PB experiment results

| Number | A (%) | B (%) | D (°C) | E (h) | G     | J (%) | L (h) | NK <sup>1</sup> (FU/g) | FAN <sup>2</sup> (g/Kg) | Sensory score |
|--------|-------|-------|--------|-------|-------|-------|-------|------------------------|-------------------------|---------------|
| 1      | 1     | 3     | 34     | 30    | 1 : 1 | 8     | 1     | 127.23±1.39            | 3.50±0.02               | 81.3          |
| 2      | 1     | 1     | 34     | 30    | 2 : 1 | 6     | 3     | 135.23±2.73            | 4.94±0.11               | 83.7          |
| 3      | 1     | 1     | 37     | 24    | 1 : 1 | 6     | 3     | 129.50±1.45            | 4.55±0.09               | 77.7          |
| 4      | 0     | 3     | 37     | 30    | 1 : 1 | 8     | 3     | 130.45±2.11            | 7.07±0.23               | 79.3          |
| 5      | 1     | 3     | 34     | 24    | 1 : 1 | 6     | 1     | 124.89±1.59            | 3.50±0.06               | 85.7          |
| 6      | 0     | 1     | 37     | 30    | 1 : 1 | 6     | 1     | 136.73±3.02            | 9.03±0.17               | 80.7          |
| 7      | 1     | 1     | 37     | 30    | 2 : 1 | 8     | 1     | 127.95±0.78            | 6.51±0.16               | 76.3          |
| 8      | 1     | 3     | 37     | 24    | 2 : 1 | 8     | 3     | 118.67±0.83            | 3.47±0.20               | 69.0          |
| 9      | 0     | 3     | 34     | 30    | 2 : 1 | 6     | 3     | 138.45±1.27            | 5.95±0.07               | 87.3          |
| 10     | 0     | 1     | 34     | 24    | 1 : 1 | 8     | 3     | 142.78±3.36            | 6.62±0.15               | 72.3          |
| 11     | 0     | 1     | 34     | 24    | 2 : 1 | 8     | 1     | 130.06±2.48            | 6.16±0.17               | 73.7          |
| 12     | 0     | 3     | 37     | 24    | 2 : 1 | 6     | 1     | 122.78±1.77            | 6.23±0.09               | 75.3          |

<sup>1</sup>NK=Nattokinase<sup>2</sup>FAN=free amino nitrogen content

Table S2 response surface experimental results

| Number | Fermentation time (h) | Fermentation temperature (°C) | inoculation volume (%) | NK <sup>1</sup> (FU/g) | FAN <sup>2</sup> (g/Kg) | Sensory score |
|--------|-----------------------|-------------------------------|------------------------|------------------------|-------------------------|---------------|
| 1      | 36                    | 37                            | 6                      | 140.61±2.51            | 8.96±0.27               | 67.6          |
| 2      | 30                    | 37                            | 4                      | 133.5±1.54             | 5.88±0.11               | 74.0          |
| 3      | 30                    | 34                            | 6                      | 128.5±2.32             | 4.69±0.07               | 87.6          |
| 4      | 24                    | 37                            | 6                      | 128.17±1.33            | 4.2±0.04                | 79.4          |
| 5      | 30                    | 37                            | 8                      | 130.22±0.98            | 5.74±0.19               | 81.8          |
| 6      | 36                    | 31                            | 6                      | 141.39±3.11            | 5.46±0.28               | 81.6          |
| 7      | 30                    | 34                            | 6                      | 130.17±1.62            | 5.81±0.08               | 84.6          |
| 8      | 24                    | 34                            | 8                      | 134.45±2.65            | 4.24±0.18               | 78.4          |
| 9      | 30                    | 34                            | 6                      | 130.22±1.61            | 5.77±0.24               | 85.8          |
| 10     | 30                    | 31                            | 4                      | 135.34±2.08            | 4.52±0.25               | 82.0          |
| 11     | 30                    | 34                            | 6                      | 138.34±1.70            | 5.6±0.18                | 83.2          |
| 12     | 30                    | 34                            | 6                      | 135.67±2.13            | 5.67±0.21               | 85.2          |
| 13     | 24                    | 34                            | 4                      | 139.17±3.34            | 5.95±0.23               | 70.8          |
| 14     | 30                    | 31                            | 8                      | 128.95±0.88            | 5.34±0.16               | 78.8          |
| 15     | 24                    | 31                            | 6                      | 136.11±1.97            | 4.26±0.05               | 77.8          |
| 16     | 36                    | 34                            | 4                      | 153.23±3.04            | 9.59±0.33               | 64.8          |
| 17     | 36                    | 34                            | 8                      | 143.34±2.15            | 8.35±0.24               | 67.2          |

<sup>1</sup>NK=Nattokinase<sup>2</sup>FAN=free amino nitrogen content

Table S3 analysis of experimental variance with Nattokinase Activity, amino acid nitrogen and sensory scores as response value

| Source                | Nattokinase Activity |    |            |         |        |              | amino acid nitrogen |    |            |         |        |              | sensory scores |    |            |         |         |              |
|-----------------------|----------------------|----|------------|---------|--------|--------------|---------------------|----|------------|---------|--------|--------------|----------------|----|------------|---------|---------|--------------|
|                       | Sum of squares       | df | Meansquare | F-value | P      | Significance | Sum of squares      | df | Meansquare | F-value | P      | Significance | Sum of squares | df | Meansquare | F-value | P       | Significance |
| Model                 | 607.08               | 9  | 67.45      | 5.52    | 0.0174 | *            | 38.12               | 9  | 4.24       | 9.08    | 0.0041 | **           | 755.76         | 9  | 83.97      | 18.65   | 0.0004  | **           |
| A- Fermentation time  | 206.76               | 1  | 206.76     | 16.92   | 0.0045 | **           | 23.50               | 1  | 23.50      | 50.39   | 0.0002 | **           | 79.38          | 1  | 79.38      | 17.63   | 0.004   | **           |
| B- Fermentation       | 10.79                | 1  | 10.79      | 0.88    | 0.3787 |              | 3.38                | 1  | 3.38       | 7.25    | 0.031  | *            | 37.85          | 1  | 37.85      | 8.41    | 0.023   | *            |
| C- inoculation volume | 73.69                | 1  | 73.69      | 6.03    | 0.0437 | *            | 0.64                | 1  | 0.64       | 1.38    | 0.2783 |              | 26.64          | 1  | 26.64      | 5.92    | 0.0452  | *            |
| AB                    | 12.82                | 1  | 12.82      | 1.05    | 0.3398 |              | 3.17                | 1  | 3.17       | 6.79    | 0.0351 | *            | 60.84          | 1  | 60.84      | 13.51   | 0.0079  | **           |
| AC                    | 6.68                 | 1  | 6.68       | 0.55    | 0.4836 |              | 0.06                | 1  | 0.06       | 0.12    | 0.7408 |              | 6.76           | 1  | 6.76       | 1.5     | 0.2601  |              |
| BC                    | 2.42                 | 1  | 2.42       | 0.2     | 0.6698 |              | 0.23                | 1  | 0.23       | 0.49    | 0.5048 |              | 30.25          | 1  | 30.25      | 6.72    | 0.0358  | *            |
| A^2                   | 222.39               | 1  | 222.39     | 18.2    | 0.0037 | **           | 3.70                | 1  | 3.70       | 7.93    | 0.0259 | *            | 323.47         | 1  | 323.47     | 71.84   | <0.0001 | **           |
| B^2                   | 45.23                | 1  | 45.23      | 3.7     | 0.0958 |              | 2.21                | 1  | 2.21       | 4.75    | 0.0657 |              | 0.03           | 1  | 0.03       | 0.0068  | 0.9368  |              |
| C^2                   | 30.69                | 1  | 30.69      | 2.51    | 0.157  |              | 1.45                | 1  | 1.45       | 3.11    | 0.121  |              | 162.64         | 1  | 162.64     | 36.12   | 0.0005  | **           |
| Residual              | 85.52                | 7  | 12.22      |         |        |              | 3.26                | 7  | 0.47       |         |        |              | 31.52          | 7  | 4.5        |         |         |              |
| Lack of Fit           | 14.77                | 3  | 4.92       | 0.28    | 0.8391 |              | 2.40                | 3  | 0.80       | 3.71    | 0.1191 |              | 21.07          | 3  | 7.02       | 2.69    | 0.1816  | *            |
| Error                 | 70.75                | 4  | 17.69      |         |        |              | 0.86                | 4  | 0.22       |         |        |              | 10.45          | 4  | 2.61       |         |         |              |
| Sum                   | 692.6                | 16 |            |         |        |              | 41.39               | 16 |            |         |        |              | 787.28         | 16 |            |         |         |              |

Note: \*\* indicates P<0.01, \* indicates P<0.05
